# Supplementary material for: Rapid Identification and Systematic Mechanism of Flavonoids from Potentilla freyniana Bornm. Based on UHPLC-Q-Exactive Orbitrap Mass Spectrometry and Network Pharmacology
Source: Int J Anal Chem. 2021 Jan 27;2021:6619959. doi: 10.1155/2021/6619959 (PMC7857931; doi:10.1155/2021/6619959)
Supplement: Supplementary Materials — Figure S1: compounds-target genes. Figure S2: PPI network. Table S1: compounds-target genes. Table S2: GO analysis. Table S3: KEGG pathway. [file 6619959.f1.zip]

Archive with 5 entries (5 files):
- Figure S1.ps
- Figure S2.ps
- Table S1.compounds-target genes.xls
- Table S2 GO analysis.xlsx
- Table S3 KEGG pathway.xlsx
