# Supplementary material for: Rapid Identification and Systematic Mechanism of Flavonoids from Potentilla freyniana Bornm. Based on UHPLC-Q-Exactive Orbitrap Mass Spectrometry and Network Pharmacology
Source: Int J Anal Chem. 2021 Jan 27;2021:6619959. doi: 10.1155/2021/6619959 (PMC7857931; doi:10.1155/2021/6619959)
Supplement: Supplementary Materials — Figure S1: compounds-target genes. Figure S2: PPI network. Table S1: compounds-target genes. Table S2: GO analysis. Table S3: KEGG pathway. [file 6619959.f1.zip › Table S1.compounds-target genes.xls]

## Sheet: C-T
Compounds	Gene Name
Vicenin II	TOP2B
Taxifolin	PTGS1
Taxifolin	PTGS2
Taxifolin	HSP90AA1
Taxifolin	PIK3CG
Taxifolin	RXRA
Taxifolin	AKR1B1
Taxifolin	RELA
Taxifolin	ICAM1
Taxifolin	DGAT2
Taxifolin	MTTP
Taxifolin	APOB
Hyperoside	TOP2B
Hyperoside	PRSS1
Hyperoside	NOS2
Hyperoside	PTGS1
Hyperoside	PTGS2
Hyperoside	HSP90AA1
Hyperoside	NCOA2
Isoquercitrin	TOP2B
Isoquercitrin	F7
Phlorizin	F7
Phlorizin	PTGS2
Eriodictyol	PTGS1
Eriodictyol	PTGS2
Eriodictyol	HSP90AA1
Eriodictyol	NCOA2
Eriodictyol	HMOX1
Eriodictyol	NFE2L2
Eriodictyol	NQO1
Quercetin	PTGS1
Quercetin	AR
Quercetin	PPARG
Quercetin	PTGS2
Quercetin	HSP90AA1
Quercetin	NCOA2
Quercetin	DPP4
Quercetin	AKR1B1
Quercetin	PRSS1
Quercetin	TOP2B
Quercetin	SERPIND1
Quercetin	KCNH2
Quercetin	SCN5A
Quercetin	F7
Quercetin	ADRB2
Quercetin	MMP3
Quercetin	F7
Quercetin	RXRA
Quercetin	ACHE
Quercetin	GABRA1
Quercetin	MAOB
Quercetin	RELA
Quercetin	EGFR
Quercetin	AKT1
Quercetin	VEGFA
Quercetin	CCND1
Quercetin	BCL2
Quercetin	BCL2L1
Quercetin	FOS
Quercetin	CDKN1A
Quercetin	EIF6
Quercetin	BAX
Quercetin	CASP9
Quercetin	PLAU
Quercetin	MMP2
Quercetin	MMP9
Quercetin	MAPK1
Quercetin	IL10
Quercetin	EGF
Quercetin	RB1
Quercetin	CD40LG
Quercetin	JUN
Quercetin	IL6
Quercetin	AHSA1
Quercetin	CASP3
Quercetin	TP53
Quercetin	ELK1
Quercetin	NFKBIA
Quercetin	POR
Quercetin	ODC1
Quercetin	XDH
Quercetin	CASP8
Quercetin	TOP1
Quercetin	SOD1
Quercetin	PRKCA
Quercetin	MMP1
Quercetin	HIF1A
Quercetin	STAT1
Quercetin	RUNX1T1
Quercetin	CDK1
Quercetin	HSPA5
Quercetin	ERBB2
Quercetin	PPARG
Quercetin	ACACA
Quercetin	HMOX1
Quercetin	CYP3A4
Quercetin	CYP1A2
Quercetin	CAV1
Quercetin	MYC
Quercetin	F3
Quercetin	GJA1
Quercetin	CYP1A1
Quercetin	ICAM1
Quercetin	IL1B
Quercetin	CCL2
Quercetin	SELE
Quercetin	VCAM1
Quercetin	PTGER3
Quercetin	CXCL8
Quercetin	PRKCB
Quercetin	BIRC5
Quercetin	DUOX2
Quercetin	NOS3
Quercetin	HSPB1
Quercetin	TGFB1
Quercetin	SULT1E1
Quercetin	MGAM
Quercetin	IL2
Quercetin	NR1I2
Quercetin	CYP1B1
Quercetin	CCNB1
Quercetin	PLAT
Quercetin	THBD
Quercetin	SERPINE1
Quercetin	COL1A1
Quercetin	IFNG
Quercetin	ALOX5
Quercetin	IL1A
Quercetin	MPO
Quercetin	TOP2A
Quercetin	NCF1
Quercetin	ABCG2
Quercetin	HAS2
Quercetin	GSTP1
Quercetin	NFE2L2
Quercetin	NQO1
Quercetin	PARP1
Quercetin	AHR
Quercetin	PSMD3
Quercetin	SLC2A4
Quercetin	COL3A1
Quercetin	CXCL11
Quercetin	CXCL2
Quercetin	DCAF5
Quercetin	NR1I3
Quercetin	CHEK2
Quercetin	INSR
Quercetin	CLDN4
Quercetin	PPARA
Quercetin	PPARD
Quercetin	HSF1
Quercetin	CRP
Quercetin	CXCL10
Quercetin	CHUK
Quercetin	SPP1
Quercetin	RUNX2
Quercetin	RASSF1
Quercetin	E2F1
Quercetin	E2F2
Quercetin	ACPP
Quercetin	CTSD
Quercetin	IGFBP3
Quercetin	IGF2
Quercetin	CD40LG
Quercetin	IRF1
Quercetin	ERBB3
Quercetin	PON1
Quercetin	DIO1
Quercetin	PCOLCE
Quercetin	NPEPPS
Quercetin	HK2
Quercetin	NKX3-1
Quercetin	RASA1
Quercetin	GSTM1
Quercetin	GSTM2
Luteolin	PTGS1
Luteolin	AR
Luteolin	PTGS2
Luteolin	HSP90AA1
Luteolin	PRSS1
Luteolin	NCOA2
Luteolin	DPP4
Luteolin	RELA
Luteolin	EGFR
Luteolin	AKT1
Luteolin	VEGFA
Luteolin	CCND1
Luteolin	BCL2L1
Luteolin	CDKN1A
Luteolin	CASP9
Luteolin	MMP2
Luteolin	MMP9
Luteolin	MAPK1
Luteolin	IL10
Luteolin	RB1
Luteolin	CDK4
Luteolin	CD40LG
Luteolin	JUN
Luteolin	IL6
Luteolin	CASP3
Luteolin	TP53
Luteolin	NFKBIA
Luteolin	XDH
Luteolin	TOP1
Luteolin	MDM2
Luteolin	APBA3
Luteolin	MMP1
Luteolin	PCNA
Luteolin	ERBB2
Luteolin	PPARG
Luteolin	HMOX1
Luteolin	CASP7
Luteolin	ICAM1
Luteolin	MCL1
Luteolin	BIRC5
Luteolin	IL2
Luteolin	CCNB1
Luteolin	TYR
Luteolin	IFNG
Luteolin	IL4
Luteolin	TOP2A
Luteolin	GSTP1
Luteolin	XIAP
Luteolin	SLC2A4
Luteolin	INSR
Luteolin	CD40LG
Luteolin	PTGES
Luteolin	NUF2
Luteolin	ADCY2
Luteolin	MET
Apigenin	PTGS1
Apigenin	AR
Apigenin	PTGS2
Apigenin	HSP90AA1
Apigenin	PRSS1
Apigenin	NCOA2
Apigenin	SCN5A
Apigenin	F7
Apigenin	F7
Apigenin	TOP2B
Apigenin	DPP4
Apigenin	PCP4
Apigenin	RELA
Apigenin	AKT1
Apigenin	VEGFA
Apigenin	CCND1
Apigenin	BCL2
Apigenin	BCL2L1
Apigenin	FOS
Apigenin	CDKN1A
Apigenin	EIF6
Apigenin	BAX
Apigenin	CASP9
Apigenin	PLAU
Apigenin	MMP9
Apigenin	RB1
Apigenin	CDK4
Apigenin	CD40LG
Apigenin	JUN
Apigenin	CDK6
Apigenin	EEF1E1
Apigenin	AHSA1
Apigenin	CASP3
Apigenin	TP53
Apigenin	NFKBIA
Apigenin	ODC1
Apigenin	MDM2
Apigenin	BAD
Apigenin	MMP1
Apigenin	HIF1A
Apigenin	IGF1R
Apigenin	RUNX1T1
Apigenin	CDK1
Apigenin	ACACA
Apigenin	HMOX1
Apigenin	ICAM1
Apigenin	MCL1
Apigenin	CCND2
Apigenin	IL2
Apigenin	CCNB1
Apigenin	SERPINE1
Apigenin	IFNG
Apigenin	IL4
Apigenin	IKBKG
Apigenin	CYP19A1
Apigenin	XIAP
Apigenin	PSMD3
Apigenin	SLC2A4
Apigenin	INSR
Apigenin	CD40LG
Apigenin	CYCS
Apigenin	CFLAR
Apigenin	AAGAB
Apigenin	INS
Apigenin	FCER2
Apigenin	IL13
Apigenin	MS4A2
Apigenin	ALPI
Apigenin	PSME3
Apigenin	G6PC
Apigenin	APC
Apigenin	TRPM2
Apigenin	AKR1C3
Apigenin	SLC5A5
Apigenin	ALG5
Kaempferol	NOS2
Kaempferol	PTGS1
Kaempferol	AR
Kaempferol	PPARG
Kaempferol	PTGS2
Kaempferol	HSP90AA1
Kaempferol	NCOA2
Kaempferol	DPP4
Kaempferol	PRSS1
Kaempferol	PGR
Kaempferol	SERPIND1
Kaempferol	CHRM1
Kaempferol	ACHE
Kaempferol	SLC6A2
Kaempferol	CHRM2
Kaempferol	ADRA1B
Kaempferol	GABRA1
Kaempferol	TOP2B
Kaempferol	F7
Kaempferol	PCP4
Kaempferol	RELA
Kaempferol	IKBKB
Kaempferol	AKT1
Kaempferol	BCL2
Kaempferol	BAX
Kaempferol	CD40LG
Kaempferol	JUN
Kaempferol	AHSA1
Kaempferol	CASP3
Kaempferol	MAPK8
Kaempferol	XDH
Kaempferol	MMP1
Kaempferol	STAT1
Kaempferol	CDK1
Kaempferol	PPARG
Kaempferol	HMOX1
Kaempferol	CYP3A4
Kaempferol	CYP1A2
Kaempferol	CYP1A1
Kaempferol	ICAM1
Kaempferol	SELE
Kaempferol	VCAM1
Kaempferol	NR1I2
Kaempferol	CYP1B1
Kaempferol	ALOX5
Kaempferol	HAS2
Kaempferol	GSTP1
Kaempferol	AHR
Kaempferol	PSMD3
Kaempferol	SLC2A4
Kaempferol	NR1I3
Kaempferol	INSR
Kaempferol	DIO1
Kaempferol	GSTM1
Kaempferol	GSTM2
Kaempferol	AKR1C3
Kaempferol	SLPI
Baicalein	PTGS1
Baicalein	AR
Baicalein	PTGS2
Baicalein	HSP90AA1
Baicalein	DPP4
Baicalein	PDE3A
Baicalein	PRSS1
Baicalein	NCOA2
Baicalein	NCOA1
Baicalein	PCP4
Baicalein	RELA
Baicalein	AKT1
Baicalein	VEGFA
Baicalein	BCL2
Baicalein	FOS
Baicalein	BAX
Baicalein	MMP9
Baicalein	CASP3
Baicalein	TP53
Baicalein	HIF1A
Baicalein	FOSL1
Baicalein	FOSL2
Baicalein	CDK1
Baicalein	CCNB1
Baicalein	MPO
Baicalein	AHR
Baicalein	IGF2
Baicalein	CYCS
Baicalein	ALOX12
Baicalein	NFATC1
Baicalein	TDRD7
Baicalein	EGLN1
Baicalein	NOX5
Baicalein	FABP5
Baicalein	APOD
Wogonin	NOS2
Wogonin	PTGS1
Wogonin	ESR1
Wogonin	AR
Wogonin	SCN5A
Wogonin	PPARG
Wogonin	PTGS2
Wogonin	RXRA
Wogonin	PDE3A
Wogonin	DPP4
Wogonin	MAPK14
Wogonin	GSK3B
Wogonin	HSP90AA1
Wogonin	CDK2
Wogonin	CHEK1
Wogonin	PRSS1
Wogonin	PCP4
Wogonin	ADRB2
Wogonin	GABRA1
Wogonin	RELA
Wogonin	AKT1
Wogonin	CCND1
Wogonin	BCL2
Wogonin	CDKN1A
Wogonin	EIF6
Wogonin	BAX
Wogonin	CASP9
Wogonin	KDR
Wogonin	CD40LG
Wogonin	JUN
Wogonin	IL6
Wogonin	AHSA1
Wogonin	CASP3
Wogonin	TP53
Wogonin	BBC3
Wogonin	TEP1
Wogonin	MMP1
Wogonin	CCL2
Wogonin	PRKCD
Wogonin	PTGER3
Wogonin	FN1
Wogonin	CXCL8
Wogonin	MCL1
