# Supplementary material for: Rapid Identification and Systematic Mechanism of Flavonoids from Potentilla freyniana Bornm. Based on UHPLC-Q-Exactive Orbitrap Mass Spectrometry and Network Pharmacology
Source: Int J Anal Chem. 2021 Jan 27;2021:6619959. doi: 10.1155/2021/6619959 (PMC7857931; doi:10.1155/2021/6619959)
Supplement: Supplementary Materials — Figure S1: compounds-target genes. Figure S2: PPI network. Table S1: compounds-target genes. Table S2: GO analysis. Table S3: KEGG pathway. [file 6619959.f1.zip › Table S2 GO analysis.xlsx]

## Sheet: Sheet1
Category	Term	Count	%	PValue	Genes	List Total	Pop Hits	Pop Total	Fold Enrichment	Bonferroni	Benjamini	FDR
GOTERM_BP_DIRECT	GO:0045944~positive regulation of transcription from RNA polymerase II promoter	10	43.4783	1.90329e-06	AKT1, EGFR, FOS, IL6, JUN, VEGFA, PPARG, TP53, ESR1, MYC	23	981	16792	7.44227	0.00155568	0.000103788	0.00293006
GOTERM_BP_DIRECT	GO:0042493~response to drug	9	39.1304	2.70036e-09	FOS, CASP3, IL6, CCND1, HSP90AA1, PTGS2, JUN, PPARG, MYC	23	304	16792	21.6144	2.20889e-06	1.10445e-06	4.15718e-06
GOTERM_BP_DIRECT	GO:0043066~negative regulation of apoptotic process	9	39.1304	6.25945e-08	AKT1, EGFR, CASP3, IL6, MMP9, VEGFA, TP53, MAPK8, MYC	23	455	16792	14.4413	5.1201e-05	8.53368e-06	9.63636e-05
GOTERM_BP_DIRECT	GO:0045893~positive regulation of transcription, DNA-templated	9	39.1304	1.62296e-07	MAPK1, FOS, IL6, JUN, PPARG, TP53, ESR1, EGF, MYC	23	515	16792	12.7588	0.00013275	1.65947e-05	0.000249853
GOTERM_BP_DIRECT	GO:0007165~signal transduction	9	39.1304	6.78976e-05	AKT1, EGFR, MAPK1, HSP90AA1, ERBB2, PPARG, ESR1, CXCL8, EGF	23	1161	16792	5.65959	0.0540278	0.00198168	0.104477
GOTERM_BP_DIRECT	GO:0010628~positive regulation of gene expression	8	34.7826	2.9013e-08	IL6, INS, ERBB2, VEGFA, TP53, MAPK8, MYC, FN1	23	262	16792	22.2927	2.37324e-05	5.93315e-06	4.46653e-05
GOTERM_BP_DIRECT	GO:0008284~positive regulation of cell proliferation	8	34.7826	1.43985e-06	EGFR, MAPK1, IL6, INS, VEGFA, EGF, MYC, FN1	23	466	16792	12.5337	0.0011771	8.41247e-05	0.00221661
GOTERM_BP_DIRECT	GO:0045429~positive regulation of nitric oxide biosynthetic process	7	30.4348	1.41858e-11	AKT1, EGFR, IL6, HSP90AA1, PTGS2, INS, ESR1	23	43	16792	118.851	1.1604e-08	1.1604e-08	2.1839e-08
GOTERM_BP_DIRECT	GO:0048661~positive regulation of smooth muscle cell proliferation	6	26.087	1.23474e-08	AKT1, EGFR, IL6, PTGS2, JUN, MYC	23	60	16792	73.0087	1.01001e-05	3.36673e-06	1.90088e-05
GOTERM_BP_DIRECT	GO:0042060~wound healing	6	26.087	5.34383e-08	EGFR, CASP3, IL6, INS, ERBB2, FN1	23	80	16792	54.7565	4.37116e-05	8.74247e-06	8.22677e-05
GOTERM_BP_DIRECT	GO:0001934~positive regulation of protein phosphorylation	6	26.087	5.43087e-07	AKT1, EGFR, CCND1, MMP9, ERBB2, VEGFA	23	127	16792	34.4923	0.000444147	4.93594e-05	0.000836075
GOTERM_BP_DIRECT	GO:0001525~angiogenesis	6	26.087	8.65005e-06	PTGS2, JUN, VEGFA, CXCL8, EGF, FN1	23	223	16792	19.6436	0.00705079	0.000353726	0.0133158
GOTERM_BP_DIRECT	GO:0000165~MAPK cascade	6	26.087	1.88602e-05	EGFR, MAPK1, INS, ERBB2, EGF, MYC	23	262	16792	16.7195	0.0153094	0.00064262	0.0290312
GOTERM_BP_DIRECT	GO:0000122~negative regulation of transcription from RNA polymerase II promoter	6	26.087	0.002048	CCND1, VEGFA, PPARG, TP53, ESR1, MYC	23	720	16792	6.08406	0.813063	0.0280233	3.10683
GOTERM_BP_DIRECT	GO:0038128~ERBB2 signaling pathway	5	21.7391	1.58359e-07	AKT1, EGFR, HSP90AA1, ERBB2, EGF	23	38	16792	96.0641	0.000129529	1.85052e-05	0.000243791
GOTERM_BP_DIRECT	GO:0048146~positive regulation of fibroblast proliferation	5	21.7391	6.69211e-07	EGFR, JUN, ESR1, MYC, FN1	23	54	16792	67.6006	0.000547265	5.47399e-05	0.00103024
GOTERM_BP_DIRECT	GO:0050679~positive regulation of epithelial cell proliferation	5	21.7391	1.02657e-06	EGFR, IL6, ERBB2, VEGFA, MYC	23	60	16792	60.8406	0.000839381	7.63365e-05	0.00158038
GOTERM_BP_DIRECT	GO:0043627~response to estrogen	5	21.7391	1.4192e-06	MAPK1, CCND1, HSP90AA1, PPARG, ESR1	23	65	16792	56.1605	0.00116023	8.92963e-05	0.00218482
GOTERM_BP_DIRECT	GO:0014066~regulation of phosphatidylinositol 3-kinase signaling	5	21.7391	2.95684e-06	AKT1, EGFR, MAPK1, ERBB2, EGF	23	78	16792	46.8004	0.00241578	0.000151157	0.00455193
GOTERM_BP_DIRECT	GO:0032355~response to estradiol	5	21.7391	5.47866e-06	CASP3, CCND1, PTGS2, ESR1, MYC	23	91	16792	40.1147	0.00447153	0.000235844	0.00843401
GOTERM_BP_DIRECT	GO:0006974~cellular response to DNA damage stimulus	5	21.7391	0.000140439	AKT1, MAPK1, CCND1, TP53, MYC	23	208	16792	17.5502	0.108533	0.00382224	0.215986
GOTERM_BP_DIRECT	GO:0043065~positive regulation of apoptotic process	5	21.7391	0.000566506	AKT1, IL6, PTGS2, TP53, MAPK8	23	300	16792	12.1681	0.370943	0.0115214	0.868583
GOTERM_BP_DIRECT	GO:0008283~cell proliferation	5	21.7391	0.00118995	AKT1, EGFR, ERBB2, TP53, MYC	23	366	16792	9.97387	0.622413	0.0200863	1.8163
GOTERM_BP_DIRECT	GO:0006954~inflammatory response	5	21.7391	0.00135375	AKT1, FOS, IL6, PTGS2, CXCL8	23	379	16792	9.63175	0.669821	0.0214935	2.06391
GOTERM_BP_DIRECT	GO:0008285~negative regulation of cell proliferation	5	21.7391	0.0015911	IL6, PTGS2, JUN, TP53, CXCL8	23	396	16792	9.21827	0.728163	0.0229915	2.42162
GOTERM_BP_DIRECT	GO:0006468~protein phosphorylation	5	21.7391	0.00266181	AKT1, MAPK1, CCND1, ERBB2, MAPK8	23	456	16792	8.00534	0.886988	0.0340154	4.02025
GOTERM_BP_DIRECT	GO:0006366~transcription from RNA polymerase II promoter	5	21.7391	0.00406508	FOS, JUN, TP53, ESR1, MYC	23	513	16792	7.11586	0.964279	0.046485	6.07833
GOTERM_BP_DIRECT	GO:0060749~mammary gland alveolus development	4	17.3913	1.31156e-06	CCND1, VEGFA, ESR1, EGF	23	17	16792	171.785	0.00107228	8.94008e-05	0.00201912
GOTERM_BP_DIRECT	GO:0051090~regulation of sequence-specific DNA binding transcription factor activity	4	17.3913	4.40614e-06	MAPK1, FOS, JUN, MAPK8	23	25	16792	116.814	0.00359774	0.000211991	0.00678299
GOTERM_BP_DIRECT	GO:0046677~response to antibiotic	4	17.3913	9.44563e-06	CASP3, IL6, HSP90AA1, TP53	23	32	16792	91.2609	0.00769679	0.000367864	0.0145405
GOTERM_BP_DIRECT	GO:0071364~cellular response to epidermal growth factor stimulus	4	17.3913	1.03814e-05	AKT1, EGFR, ERBB2, MYC	23	33	16792	88.4954	0.00845605	0.000385926	0.0159808
GOTERM_BP_DIRECT	GO:0009409~response to cold	4	17.3913	1.3551e-05	FOS, IL6, HSP90AA1, PPARG	23	36	16792	81.1208	0.0110236	0.000481833	0.0208597
GOTERM_BP_DIRECT	GO:0045740~positive regulation of DNA replication	4	17.3913	2.16773e-05	EGFR, IL6, INS, JUN	23	42	16792	69.5321	0.0175759	0.000709036	0.0333667
GOTERM_BP_DIRECT	GO:0043406~positive regulation of MAP kinase activity	4	17.3913	6.05062e-05	EGFR, ERBB2, VEGFA, EGF	23	59	16792	49.4974	0.0482906	0.00190187	0.0931082
GOTERM_BP_DIRECT	GO:0006950~response to stress	4	17.3913	6.68715e-05	EGFR, MAPK1, HSP90AA1, MAPK8	23	61	16792	47.8746	0.0532334	0.00202398	0.102898
GOTERM_BP_DIRECT	GO:0071260~cellular response to mechanical stimulus	4	17.3913	0.0001053	AKT1, EGFR, PTGS2, MAPK8	23	71	16792	41.1317	0.0825341	0.00296593	0.161985
GOTERM_BP_DIRECT	GO:0050731~positive regulation of peptidyl-tyrosine phosphorylation	4	17.3913	0.000161643	IL6, INS, VEGFA, TP53	23	82	16792	35.614	0.123865	0.00425656	0.248559
GOTERM_BP_DIRECT	GO:0030307~positive regulation of cell growth	4	17.3913	0.000173621	AKT1, EGFR, INS, ERBB2	23	84	16792	34.766	0.132409	0.00442874	0.266955
GOTERM_BP_DIRECT	GO:0071456~cellular response to hypoxia	4	17.3913	0.000257711	AKT1, PTGS2, VEGFA, TP53	23	96	16792	30.4203	0.190092	0.00618184	0.396009
GOTERM_BP_DIRECT	GO:0042593~glucose homeostasis	4	17.3913	0.000299312	AKT1, IL6, INS, PPARG	23	101	16792	28.9143	0.217197	0.00697199	0.459797
GOTERM_BP_DIRECT	GO:0051091~positive regulation of sequence-specific DNA binding transcription factor activity	4	17.3913	0.000335548	AKT1, IL6, PPARG, ESR1	23	105	16792	27.8128	0.240066	0.00759667	0.515327
GOTERM_BP_DIRECT	GO:0048015~phosphatidylinositol-mediated signaling	4	17.3913	0.000345028	AKT1, EGFR, ERBB2, EGF	23	106	16792	27.5505	0.245939	0.00760021	0.529851
GOTERM_BP_DIRECT	GO:0018108~peptidyl-tyrosine phosphorylation	4	17.3913	0.00100584	EGFR, HSP90AA1, ERBB2, EGF	23	153	16792	19.0872	0.560971	0.0181268	1.53732
GOTERM_BP_DIRECT	GO:0032496~response to lipopolysaccharide	4	17.3913	0.00122889	FOS, CASP3, PTGS2, JUN	23	164	16792	17.807	0.634266	0.0203183	1.87522
GOTERM_BP_DIRECT	GO:0007568~aging	4	17.3913	0.00125059	AKT1, FOS, IL6, JUN	23	165	16792	17.6991	0.640708	0.0202643	1.90803
GOTERM_BP_DIRECT	GO:0070374~positive regulation of ERK1 and ERK2 cascade	4	17.3913	0.00148098	EGFR, IL6, JUN, VEGFA	23	175	16792	16.6877	0.702501	0.0226148	2.25582
GOTERM_BP_DIRECT	GO:0038095~Fc-epsilon receptor signaling pathway	4	17.3913	0.00155496	MAPK1, FOS, JUN, MAPK8	23	178	16792	16.4064	0.719994	0.0228787	2.36724
GOTERM_BP_DIRECT	GO:0030335~positive regulation of cell migration	4	17.3913	0.0017098	EGFR, MAPK1, INS, VEGFA	23	184	16792	15.8715	0.753356	0.024259	2.60007
GOTERM_BP_DIRECT	GO:0043547~positive regulation of GTPase activity	4	17.3913	0.0362762	EGFR, JUN, ERBB2, EGF	23	565	16792	5.16876	1	0.246089	43.3824
GOTERM_BP_DIRECT	GO:0070141~response to UV-A	3	13.0435	4.91178e-06	AKT1, EGFR, CCND1	23	3	16792	730.087	0.00400979	0.000223189	0.00756138
GOTERM_BP_DIRECT	GO:0030224~monocyte differentiation	3	13.0435	0.000220206	JUN, VEGFA, PPARG	23	17	16792	128.839	0.164853	0.00544416	0.338468
GOTERM_BP_DIRECT	GO:0010165~response to X-ray	3	13.0435	0.000372545	CASP3, CCND1, TP53	23	22	16792	99.5573	0.262728	0.00798892	0.571993
GOTERM_BP_DIRECT	GO:0051000~positive regulation of nitric-oxide synthase activity	3	13.0435	0.000372545	AKT1, INS, ESR1	23	22	16792	99.5573	0.262728	0.00798892	0.571993
GOTERM_BP_DIRECT	GO:0050999~regulation of nitric-oxide synthase activity	3	13.0435	0.000522482	AKT1, EGFR, HSP90AA1	23	26	16792	84.2408	0.347864	0.0109017	0.801338
GOTERM_BP_DIRECT	GO:2000145~regulation of cell motility	3	13.0435	0.000606723	EGFR, ERBB2, EGF	23	28	16792	78.2236	0.391312	0.0120355	0.929976
GOTERM_BP_DIRECT	GO:0043388~positive regulation of DNA binding	3	13.0435	0.000606723	MMP9, EGF, MYC	23	28	16792	78.2236	0.391312	0.0120355	0.929976
GOTERM_BP_DIRECT	GO:0097421~liver regeneration	3	13.0435	0.000651149	EGFR, CCND1, MYC	23	29	16792	75.5262	0.413048	0.0126059	0.997753
GOTERM_BP_DIRECT	GO:0071392~cellular response to estradiol stimulus	3	13.0435	0.000744591	EGFR, IL6, ESR1	23	31	16792	70.6536	0.45627	0.0140699	1.14017
GOTERM_BP_DIRECT	GO:0045907~positive regulation of vasoconstriction	3	13.0435	0.000793601	AKT1, EGFR, PTGS2	23	32	16792	68.4457	0.477653	0.0146512	1.21479
GOTERM_BP_DIRECT	GO:0018107~peptidyl-threonine phosphorylation	3	13.0435	0.00111946	AKT1, MAPK1, MAPK8	23	38	16792	57.6384	0.599977	0.0197211	1.70959
GOTERM_BP_DIRECT	GO:0006953~acute-phase response	3	13.0435	0.00117904	IL6, INS, FN1	23	39	16792	56.1605	0.619025	0.020323	1.7998
GOTERM_BP_DIRECT	GO:0043525~positive regulation of neuron apoptotic process	3	13.0435	0.00143226	CASP3, JUN, TP53	23	43	16792	50.9363	0.690385	0.0222944	2.18236
GOTERM_BP_DIRECT	GO:0034644~cellular response to UV	3	13.0435	0.00149927	PTGS2, TP53, MYC	23	44	16792	49.7787	0.706924	0.0224719	2.28337
GOTERM_BP_DIRECT	GO:0009408~response to heat	3	13.0435	0.00178205	AKT1, IL6, HSP90AA1	23	48	16792	45.6304	0.767536	0.0248418	2.70855
GOTERM_BP_DIRECT	GO:0032880~regulation of protein localization	3	13.0435	0.00208823	AKT1, INS, MAPK8	23	52	16792	42.1204	0.819127	0.0280971	3.16694
GOTERM_BP_DIRECT	GO:0045727~positive regulation of translation	3	13.0435	0.00216841	MAPK1, IL6, ERBB2	23	53	16792	41.3257	0.830632	0.0286899	3.28664
GOTERM_BP_DIRECT	GO:0051592~response to calcium ion	3	13.0435	0.00259086	EGFR, IL6, CCND1	23	58	16792	37.7631	0.880217	0.0336479	3.91508
GOTERM_BP_DIRECT	GO:0051384~response to glucocorticoid	3	13.0435	0.00324211	CASP3, IL6, PTGS2	23	65	16792	33.6963	0.929796	0.0406559	4.87639
GOTERM_BP_DIRECT	GO:0006006~glucose metabolic process	3	13.0435	0.00344085	AKT1, INS, MYC	23	67	16792	32.6905	0.940362	0.0424491	5.16796
GOTERM_BP_DIRECT	GO:0043154~negative regulation of cysteine-type endopeptidase activity involved in apoptotic process	3	13.0435	0.00364516	AKT1, IL6, VEGFA	23	69	16792	31.7429	0.949571	0.0442515	5.46683
GOTERM_BP_DIRECT	GO:0001938~positive regulation of endothelial cell proliferation	3	13.0435	0.00364516	AKT1, JUN, VEGFA	23	69	16792	31.7429	0.949571	0.0442515	5.46683
GOTERM_BP_DIRECT	GO:0035690~cellular response to drug	3	13.0435	0.00364516	EGFR, TP53, MYC	23	69	16792	31.7429	0.949571	0.0442515	5.46683
GOTERM_BP_DIRECT	GO:0033138~positive regulation of peptidyl-serine phosphorylation	3	13.0435	0.0037494	AKT1, IL6, VEGFA	23	70	16792	31.2894	0.953708	0.0448266	5.61898
GOTERM_BP_DIRECT	GO:0071347~cellular response to interleukin-1	3	13.0435	0.00385503	IL6, CXCL8, MYC	23	71	16792	30.8487	0.957553	0.0454005	5.77292
GOTERM_BP_DIRECT	GO:0032869~cellular response to insulin stimulus	3	13.0435	0.00451766	AKT1, PPARG, MYC	23	77	16792	28.4449	0.975371	0.0508292	6.73326
GOTERM_BP_DIRECT	GO:0060070~canonical Wnt signaling pathway	3	13.0435	0.00522926	CCND1, EGF, MYC	23	83	16792	26.3887	0.986278	0.0578268	7.75436
GOTERM_BP_DIRECT	GO:0051897~positive regulation of protein kinase B signaling	3	13.0435	0.00535257	EGFR, IL6, INS	23	84	16792	26.0745	0.987601	0.057601	7.93024
GOTERM_BP_DIRECT	GO:0046854~phosphatidylinositol phosphorylation	3	13.0435	0.00665859	EGFR, ERBB2, EGF	23	94	16792	23.3006	0.995767	0.0702745	9.77388
GOTERM_BP_DIRECT	GO:0002576~platelet degranulation	3	13.0435	0.00794549	VEGFA, EGF, FN1	23	103	16792	21.2647	0.998534	0.0812535	11.5567
GOTERM_BP_DIRECT	GO:0006979~response to oxidative stress	3	13.0435	0.00901782	AKT1, EGFR, PTGS2	23	110	16792	19.9115	0.999395	0.0906275	13.0171
GOTERM_BP_DIRECT	GO:0071222~cellular response to lipopolysaccharide	3	13.0435	0.0094962	IL6, CXCL8, MAPK8	23	113	16792	19.3828	0.999592	0.0929545	13.6613
GOTERM_BP_DIRECT	GO:0030168~platelet activation	3	13.0435	0.00982133	AKT1, MAPK1, IL6	23	115	16792	19.0457	0.999688	0.0948672	14.0965
GOTERM_BP_DIRECT	GO:0018105~peptidyl-serine phosphorylation	3	13.0435	0.0115205	AKT1, MAPK1, MAPK8	23	125	16792	17.5221	0.999924	0.107919	16.3381
GOTERM_BP_DIRECT	GO:0008360~regulation of cell shape	3	13.0435	0.0142938	IL6, VEGFA, FN1	23	140	16792	15.6447	0.999992	0.127976	19.8795
GOTERM_BP_DIRECT	GO:0007050~cell cycle arrest	3	13.0435	0.014488	TP53, CXCL8, MYC	23	141	16792	15.5338	0.999993	0.126858	20.1222
GOTERM_BP_DIRECT	GO:0046777~protein autophosphorylation	3	13.0435	0.0210661	AKT1, EGFR, ERBB2	23	172	16792	12.7341	1	0.169127	27.9475
GOTERM_BP_DIRECT	GO:0007049~cell cycle	3	13.0435	0.0324056	MAPK1, CCND1, TP53	23	217	16792	10.0934	1	0.230196	39.7786
GOTERM_BP_DIRECT	GO:1990646~cellular response to prolactin	2	8.69565	0.00392553	IL6, MYC	23	3	16792	486.725	0.959941	0.0455586	5.87552
GOTERM_BP_DIRECT	GO:0000320~re-entry into mitotic cell cycle	2	8.69565	0.00523077	CCND1, MYC	23	4	16792	365.043	0.986295	0.0570736	7.75651
GOTERM_BP_DIRECT	GO:0090336~positive regulation of brown fat cell differentiation	2	8.69565	0.00783635	PTGS2, INS	23	6	16792	243.362	0.998396	0.0811901	11.4068
GOTERM_BP_DIRECT	GO:0090050~positive regulation of cell migration involved in sprouting angiogenesis	2	8.69565	0.00913669	PTGS2, VEGFA	23	7	16792	208.596	0.999451	0.0906635	13.1776
GOTERM_BP_DIRECT	GO:0031659~positive regulation of cyclin-dependent protein serine/threonine kinase activity involved in G1/S transition of mitotic cell cycle	2	8.69565	0.0104354	AKT1, EGFR	23	8	16792	182.522	0.999812	0.0993572	14.913
GOTERM_BP_DIRECT	GO:0097011~cellular response to granulocyte macrophage colony-stimulating factor stimulus	2	8.69565	0.0104354	AKT1, MAPK1	23	8	16792	182.522	0.999812	0.0993572	14.913
GOTERM_BP_DIRECT	GO:0032966~negative regulation of collagen biosynthetic process	2	8.69565	0.0104354	IL6, PPARG	23	8	16792	182.522	0.999812	0.0993572	14.913
GOTERM_BP_DIRECT	GO:0002674~negative regulation of acute inflammatory response	2	8.69565	0.0104354	INS, PPARG	23	8	16792	182.522	0.999812	0.0993572	14.913
GOTERM_BP_DIRECT	GO:0033598~mammary gland epithelial cell proliferation	2	8.69565	0.0104354	MAPK1, CCND1	23	8	16792	182.522	0.999812	0.0993572	14.913
GOTERM_BP_DIRECT	GO:0008635~activation of cysteine-type endopeptidase activity involved in apoptotic process by cytochrome c	2	8.69565	0.0117325	CASP3, CYCS	23	9	16792	162.242	0.999936	0.108569	16.6139
GOTERM_BP_DIRECT	GO:0033160~positive regulation of protein import into nucleus, translocation	2	8.69565	0.013028	IL6, HSP90AA1	23	10	16792	146.017	0.999978	0.118561	18.2809
GOTERM_BP_DIRECT	GO:0031571~mitotic G1 DNA damage checkpoint	2	8.69565	0.0143218	CCND1, TP53	23	11	16792	132.743	0.999992	0.126836	19.9146
GOTERM_BP_DIRECT	GO:0046889~positive regulation of lipid biosynthetic process	2	8.69565	0.0156141	AKT1, INS	23	12	16792	121.681	0.999997	0.134667	21.5158
GOTERM_BP_DIRECT	GO:0035413~positive regulation of catenin import into nucleus	2	8.69565	0.0156141	EGFR, EGF	23	12	16792	121.681	0.999997	0.134667	21.5158
GOTERM_BP_DIRECT	GO:0030728~ovulation	2	8.69565	0.0156141	PTGS2, MYC	23	12	16792	121.681	0.999997	0.134667	21.5158
GOTERM_BP_DIRECT	GO:0031000~response to caffeine	2	8.69565	0.0156141	IL6, PPARG	23	12	16792	121.681	0.999997	0.134667	21.5158
GOTERM_BP_DIRECT	GO:0071391~cellular response to estrogen stimulus	2	8.69565	0.0169047	ESR1, MYC	23	13	16792	112.321	0.999999	0.143549	23.0851
GOTERM_BP_DIRECT	GO:0061029~eyelid development in camera-type eye	2	8.69565	0.0169047	EGFR, JUN	23	13	16792	112.321	0.999999	0.143549	23.0851
GOTERM_BP_DIRECT	GO:0045821~positive regulation of glycolytic process	2	8.69565	0.0181937	INS, MYC	23	14	16792	104.298	1	0.152148	24.6231
GOTERM_BP_DIRECT	GO:0045721~negative regulation of gluconeogenesis	2	8.69565	0.0181937	IL6, INS	23	14	16792	104.298	1	0.152148	24.6231
GOTERM_BP_DIRECT	GO:1902176~negative regulation of oxidative stress-induced intrinsic apoptotic signaling pathway	2	8.69565	0.0181937	AKT1, INS	23	14	16792	104.298	1	0.152148	24.6231
GOTERM_BP_DIRECT	GO:0032270~positive regulation of cellular protein metabolic process	2	8.69565	0.0194811	AKT1, INS	23	15	16792	97.3449	1	0.160477	26.1304
GOTERM_BP_DIRECT	GO:0051974~negative regulation of telomerase activity	2	8.69565	0.0194811	PPARG, TP53	23	15	16792	97.3449	1	0.160477	26.1304
GOTERM_BP_DIRECT	GO:0050930~induction of positive chemotaxis	2	8.69565	0.0194811	VEGFA, CXCL8	23	15	16792	97.3449	1	0.160477	26.1304
GOTERM_BP_DIRECT	GO:0045725~positive regulation of glycogen biosynthetic process	2	8.69565	0.0194811	AKT1, INS	23	15	16792	97.3449	1	0.160477	26.1304
GOTERM_BP_DIRECT	GO:0097194~execution phase of apoptosis	2	8.69565	0.0207668	AKT1, CASP3	23	16	16792	91.2609	1	0.168548	27.6077
GOTERM_BP_DIRECT	GO:0035994~response to muscle stretch	2	8.69565	0.0207668	FOS, JUN	23	16	16792	91.2609	1	0.168548	27.6077
GOTERM_BP_DIRECT	GO:0071380~cellular response to prostaglandin E stimulus	2	8.69565	0.022051	AKT1, PPARG	23	17	16792	85.8926	1	0.174689	29.0555
GOTERM_BP_DIRECT	GO:0030225~macrophage differentiation	2	8.69565	0.0233335	MMP9, VEGFA	23	18	16792	81.1208	1	0.182233	30.4744
GOTERM_BP_DIRECT	GO:0051412~response to corticosterone	2	8.69565	0.0233335	FOS, CCND1	23	18	16792	81.1208	1	0.182233	30.4744
GOTERM_BP_DIRECT	GO:0060716~labyrinthine layer blood vessel development	2	8.69565	0.0246145	AKT1, MAPK1	23	19	16792	76.8513	1	0.189554	31.865
GOTERM_BP_DIRECT	GO:0043536~positive regulation of blood vessel endothelial cell migration	2	8.69565	0.0246145	AKT1, VEGFA	23	19	16792	76.8513	1	0.189554	31.865
GOTERM_BP_DIRECT	GO:0051968~positive regulation of synaptic transmission, glutamatergic	2	8.69565	0.0246145	EGFR, PTGS2	23	19	16792	76.8513	1	0.189554	31.865
GOTERM_BP_DIRECT	GO:1902895~positive regulation of pri-miRNA transcription from RNA polymerase II promoter	2	8.69565	0.0258938	FOS, JUN	23	20	16792	73.0087	1	0.196664	33.2279
GOTERM_BP_DIRECT	GO:0045861~negative regulation of proteolysis	2	8.69565	0.0271716	AKT1, INS	23	21	16792	69.5321	1	0.203569	34.5636
GOTERM_BP_DIRECT	GO:1900182~positive regulation of protein localization to nucleus	2	8.69565	0.0271716	AKT1, INS	23	21	16792	69.5321	1	0.203569	34.5636
GOTERM_BP_DIRECT	GO:0035902~response to immobilization stress	2	8.69565	0.0271716	FOS, PPARG	23	21	16792	69.5321	1	0.203569	34.5636
GOTERM_BP_DIRECT	GO:0031954~positive regulation of protein autophosphorylation	2	8.69565	0.0271716	INS, VEGFA	23	21	16792	69.5321	1	0.203569	34.5636
GOTERM_BP_DIRECT	GO:0048754~branching morphogenesis of an epithelial tube	2	8.69565	0.0297223	VEGFA, EGF	23	23	16792	63.4858	1	0.218714	37.1557
GOTERM_BP_DIRECT	GO:0035924~cellular response to vascular endothelial growth factor stimulus	2	8.69565	0.0297223	AKT1, VEGFA	23	23	16792	63.4858	1	0.218714	37.1557
GOTERM_BP_DIRECT	GO:0045742~positive regulation of epidermal growth factor receptor signaling pathway	2	8.69565	0.0309952	AKT1, MMP9	23	24	16792	60.8406	1	0.225086	38.413
GOTERM_BP_DIRECT	GO:0070371~ERK1 and ERK2 cascade	2	8.69565	0.0309952	MAPK1, EGF	23	24	16792	60.8406	1	0.225086	38.413
GOTERM_BP_DIRECT	GO:0042327~positive regulation of phosphorylation	2	8.69565	0.0322666	EGFR, EGF	23	25	16792	58.407	1	0.231283	39.6453
GOTERM_BP_DIRECT	GO:0070372~regulation of ERK1 and ERK2 cascade	2	8.69565	0.0322666	ERBB2, FN1	23	25	16792	58.407	1	0.231283	39.6453
GOTERM_BP_DIRECT	GO:0034612~response to tumor necrosis factor	2	8.69565	0.0322666	CASP3, PTGS2	23	25	16792	58.407	1	0.231283	39.6453
GOTERM_BP_DIRECT	GO:0031018~endocrine pancreas development	2	8.69565	0.0335363	AKT1, IL6	23	26	16792	56.1605	1	0.235322	40.853
GOTERM_BP_DIRECT	GO:0002053~positive regulation of mesenchymal cell proliferation	2	8.69565	0.0335363	VEGFA, MYC	23	26	16792	56.1605	1	0.235322	40.853
GOTERM_BP_DIRECT	GO:0045840~positive regulation of mitotic nuclear division	2	8.69565	0.0335363	INS, EGF	23	26	16792	56.1605	1	0.235322	40.853
GOTERM_BP_DIRECT	GO:0035987~endodermal cell differentiation	2	8.69565	0.0348045	MMP9, FN1	23	27	16792	54.0805	1	0.241168	42.0366
GOTERM_BP_DIRECT	GO:0010800~positive regulation of peptidyl-threonine phosphorylation	2	8.69565	0.0348045	MAPK1, EGF	23	27	16792	54.0805	1	0.241168	42.0366
GOTERM_BP_DIRECT	GO:0090200~positive regulation of release of cytochrome c from mitochondria	2	8.69565	0.0360711	MMP9, TP53	23	28	16792	52.1491	1	0.24686	43.1966
GOTERM_BP_DIRECT	GO:0051973~positive regulation of telomerase activity	2	8.69565	0.0373361	MAPK1, MYC	23	29	16792	50.3508	1	0.250389	44.3334
GOTERM_BP_DIRECT	GO:0071549~cellular response to dexamethasone stimulus	2	8.69565	0.0373361	EGFR, IL6	23	29	16792	50.3508	1	0.250389	44.3334
GOTERM_BP_DIRECT	GO:0045909~positive regulation of vasodilation	2	8.69565	0.0373361	EGFR, INS	23	29	16792	50.3508	1	0.250389	44.3334
GOTERM_BP_DIRECT	GO:0097193~intrinsic apoptotic signaling pathway	2	8.69565	0.0385995	CYCS, TP53	23	30	16792	48.6725	1	0.255775	45.4476
GOTERM_BP_DIRECT	GO:0044344~cellular response to fibroblast growth factor stimulus	2	8.69565	0.0385995	CXCL8, MYC	23	30	16792	48.6725	1	0.255775	45.4476
GOTERM_BP_DIRECT	GO:0046326~positive regulation of glucose import	2	8.69565	0.0385995	AKT1, INS	23	30	16792	48.6725	1	0.255775	45.4476
GOTERM_BP_DIRECT	GO:1900740~positive regulation of protein insertion into mitochondrial membrane involved in apoptotic signaling pathway	2	8.69565	0.0385995	TP53, MAPK8	23	30	16792	48.6725	1	0.255775	45.4476
GOTERM_BP_DIRECT	GO:0010332~response to gamma radiation	2	8.69565	0.0398614	TP53, MYC	23	31	16792	47.1024	1	0.261027	46.5395
GOTERM_BP_DIRECT	GO:0045765~regulation of angiogenesis	2	8.69565	0.0398614	IL6, ERBB2	23	31	16792	47.1024	1	0.261027	46.5395
GOTERM_BP_DIRECT	GO:0048147~negative regulation of fibroblast proliferation	2	8.69565	0.0398614	TP53, MYC	23	31	16792	47.1024	1	0.261027	46.5395
GOTERM_BP_DIRECT	GO:0043200~response to amino acid	2	8.69565	0.0398614	CASP3, IL6	23	31	16792	47.1024	1	0.261027	46.5395
GOTERM_BP_DIRECT	GO:0031663~lipopolysaccharide-mediated signaling pathway	2	8.69565	0.0411216	AKT1, MAPK1	23	32	16792	45.6304	1	0.266148	47.6096
GOTERM_BP_DIRECT	GO:0042177~negative regulation of protein catabolic process	2	8.69565	0.0411216	EGFR, INS	23	32	16792	45.6304	1	0.266148	47.6096
GOTERM_BP_DIRECT	GO:0015758~glucose transport	2	8.69565	0.0423803	AKT1, INS	23	33	16792	44.2477	1	0.271143	48.6584
GOTERM_BP_DIRECT	GO:0045787~positive regulation of cell cycle	2	8.69565	0.0436374	CCND1, MYC	23	34	16792	42.9463	1	0.276017	49.6862
GOTERM_BP_DIRECT	GO:0042059~negative regulation of epidermal growth factor receptor signaling pathway	2	8.69565	0.0461468	EGFR, EGF	23	36	16792	40.5604	1	0.287523	51.6808
GOTERM_BP_DIRECT	GO:0048469~cell maturation	2	8.69565	0.0461468	VEGFA, PPARG	23	36	16792	40.5604	1	0.287523	51.6808
GOTERM_BP_DIRECT	GO:0007611~learning or memory	2	8.69565	0.0461468	EGFR, CASP3	23	36	16792	40.5604	1	0.287523	51.6808
GOTERM_BP_DIRECT	GO:0045597~positive regulation of cell differentiation	2	8.69565	0.0473992	INS, JUN	23	37	16792	39.4642	1	0.292066	52.6483
GOTERM_BP_DIRECT	GO:0042517~positive regulation of tyrosine phosphorylation of Stat3 protein	2	8.69565	0.04865	IL6, VEGFA	23	38	16792	38.4256	1	0.296504	53.5964
GOTERM_CC_DIRECT	GO:0005634~nucleus	16	69.5652	0.000216463	EGFR, HSP90AA1, PTGS2, ERBB2, PPARG, CYCS, TP53, ESR1, AKT1, MAPK1, FOS, CASP3, CCND1, JUN, MAPK8, MYC	23	5415	18224	2.34119	0.0216278	0.00726186	0.240446
GOTERM_CC_DIRECT	GO:0005654~nucleoplasm	12	52.1739	0.000141853	AKT1, MAPK1, FOS, CASP3, CCND1, HSP90AA1, JUN, PPARG, TP53, ESR1, MAPK8, MYC	23	2784	18224	3.41529	0.014226	0.00713848	0.157629
GOTERM_CC_DIRECT	GO:0005829~cytosol	12	52.1739	0.000690069	AKT1, MAPK1, FOS, CASP3, CCND1, HSP90AA1, JUN, CYCS, PPARG, TP53, MAPK8, MYC	23	3315	18224	2.86823	0.067346	0.0172792	0.764693
GOTERM_CC_DIRECT	GO:0005737~cytoplasm	12	52.1739	0.0278563	AKT1, EGFR, MAPK1, CASP3, IL6, CCND1, HSP90AA1, PTGS2, ERBB2, VEGFA, TP53, ESR1	23	5222	18224	1.82079	0.942353	0.211627	26.9599
GOTERM_CC_DIRECT	GO:0005615~extracellular space	8	34.7826	0.000752817	EGFR, IL6, INS, MMP9, VEGFA, CXCL8, EGF, FN1	23	1347	18224	4.70585	0.0732423	0.0150975	0.833961
GOTERM_CC_DIRECT	GO:0005576~extracellular region	8	34.7826	0.00215365	IL6, HSP90AA1, INS, MMP9, VEGFA, CXCL8, EGF, FN1	23	1610	18224	3.93713	0.195676	0.0306288	2.36896
GOTERM_CC_DIRECT	GO:0016020~membrane	7	30.4348	0.0416282	EGFR, FOS, CCND1, HSP90AA1, ERBB2, VEGFA, ESR1	23	2200	18224	2.52111	0.986356	0.235402	37.676
GOTERM_CC_DIRECT	GO:0043234~protein complex	6	26.087	0.000110477	AKT1, MAPK1, HSP90AA1, PTGS2, TP53, MYC	23	412	18224	11.539	0.0110968	0.0110968	0.122783
GOTERM_CC_DIRECT	GO:0005739~mitochondrion	6	26.087	0.0190784	AKT1, MAPK1, CYCS, TP53, MAPK8, MYC	23	1331	18224	3.57182	0.85709	0.176798	19.2817
GOTERM_CC_DIRECT	GO:0016324~apical plasma membrane	4	17.3913	0.00495601	EGFR, HSP90AA1, ERBB2, FN1	23	291	18224	10.8914	0.394561	0.0607985	5.37501
GOTERM_CC_DIRECT	GO:0048471~perinuclear region of cytoplasm	4	17.3913	0.0374644	EGFR, HSP90AA1, ERBB2, PPARG	23	621	18224	5.10369	0.97886	0.240786	34.5978
GOTERM_CC_DIRECT	GO:0031093~platelet alpha granule lumen	3	13.0435	0.00198737	VEGFA, EGF, FN1	23	55	18224	43.219	0.182025	0.0329328	2.18789
GOTERM_CC_DIRECT	GO:0043235~receptor complex	3	13.0435	0.0101604	EGFR, ERBB2, EGF	23	127	18224	18.7169	0.643512	0.108283	10.7352
GOTERM_CC_DIRECT	GO:0016323~basolateral plasma membrane	3	13.0435	0.0196856	EGFR, HSP90AA1, ERBB2	23	180	18224	13.2058	0.865754	0.166859	19.8356
GOTERM_CC_DIRECT	GO:0043005~neuron projection	3	13.0435	0.0327916	FOS, HSP90AA1, PTGS2	23	237	18224	10.0297	0.965523	0.228205	30.979
GOTERM_CC_DIRECT	GO:0005578~proteinaceous extracellular matrix	3	13.0435	0.0410229	MMP9, VEGFA, FN1	23	268	18224	8.86957	0.985458	0.245761	37.2368
GOTERM_MF_DIRECT	GO:0005515~protein binding	23	100	5.67643e-07	EGFR, IL6, HSP90AA1, PTGS2, MMP9, ERBB2, PPARG, CYCS, TP53, ESR1, CXCL8, AKT1, FOS, MAPK1, CASP3, CCND1, INS, JUN, VEGFA, MAPK8, EGF, MYC, FN1	23	8785	16881	1.92157	9.4792e-05	1.89591e-05	0.000690431
GOTERM_MF_DIRECT	GO:0042802~identical protein binding	13	56.5217	2.2924e-11	EGFR, AKT1, MAPK1, HSP90AA1, INS, JUN, MMP9, ERBB2, VEGFA, PPARG, TP53, ESR1, FN1	23	749	16881	12.7389	3.82831e-09	3.82831e-09	2.78828e-08
GOTERM_MF_DIRECT	GO:0019899~enzyme binding	9	39.1304	5.29963e-09	AKT1, EGFR, CCND1, PTGS2, JUN, PPARG, TP53, ESR1, MAPK8	23	333	16881	19.8367	8.85038e-07	4.42519e-07	6.44602e-06
GOTERM_MF_DIRECT	GO:0008134~transcription factor binding	8	34.7826	4.86774e-08	MAPK1, FOS, CCND1, JUN, PPARG, TP53, ESR1, MYC	23	284	16881	20.6748	8.12909e-06	2.7097e-06	5.9207e-05
GOTERM_MF_DIRECT	GO:0005524~ATP binding	7	30.4348	0.0103133	AKT1, EGFR, MAPK1, HSP90AA1, ERBB2, TP53, MAPK8	23	1495	16881	3.43659	0.82294	0.0791345	11.8468
GOTERM_MF_DIRECT	GO:0003677~DNA binding	7	30.4348	0.0174626	MAPK1, FOS, JUN, PPARG, TP53, ESR1, MYC	23	1674	16881	3.06911	0.947241	0.11102	19.2875
GOTERM_MF_DIRECT	GO:0003682~chromatin binding	6	26.087	0.000123602	EGFR, FOS, JUN, PPARG, TP53, ESR1	23	391	16881	11.2628	0.0204312	0.00294463	0.150236
GOTERM_MF_DIRECT	GO:0046982~protein heterodimerization activity	6	26.087	0.000277272	EGFR, FOS, JUN, ERBB2, VEGFA, TP53	23	465	16881	9.47041	0.0452549	0.00577213	0.336729
GOTERM_MF_DIRECT	GO:0043565~sequence-specific DNA binding	6	26.087	0.000455704	FOS, JUN, PPARG, TP53, ESR1, MYC	23	518	16881	8.50143	0.0732949	0.00758309	0.552872
GOTERM_MF_DIRECT	GO:0003700~transcription factor activity, sequence-specific DNA binding	6	26.087	0.00691921	FOS, JUN, PPARG, TP53, ESR1, MYC	23	961	16881	4.58245	0.686365	0.062387	8.09841
GOTERM_MF_DIRECT	GO:0019903~protein phosphatase binding	5	21.7391	1.22492e-06	EGFR, HSP90AA1, ERBB2, PPARG, TP53	23	63	16881	58.2505	0.000204541	3.40931e-05	0.00148988
GOTERM_MF_DIRECT	GO:0030235~nitric-oxide synthase regulator activity	4	17.3913	1.07129e-07	AKT1, EGFR, HSP90AA1, ESR1	23	8	16881	366.978	1.78904e-05	4.47264e-06	0.000130303
GOTERM_MF_DIRECT	GO:0002020~protease binding	4	17.3913	0.000294732	CASP3, INS, TP53, FN1	23	101	16881	29.0676	0.0480355	0.00545479	0.357898
GOTERM_MF_DIRECT	GO:0004713~protein tyrosine kinase activity	4	17.3913	0.000659846	EGFR, HSP90AA1, ERBB2, EGF	23	133	16881	22.0739	0.104373	0.00997093	0.799632
GOTERM_MF_DIRECT	GO:0044212~transcription regulatory region DNA binding	4	17.3913	0.00255535	FOS, JUN, PPARG, TP53	23	213	16881	13.7832	0.347726	0.0323341	3.06416
GOTERM_MF_DIRECT	GO:0001077~transcriptional activator activity, RNA polymerase II core promoter proximal region sequence-specific binding	4	17.3913	0.00341375	FOS, JUN, ESR1, MYC	23	236	16881	12.4399	0.435081	0.0373559	4.07399
GOTERM_MF_DIRECT	GO:0016301~kinase activity	4	17.3913	0.00362104	AKT1, MAPK1, ERBB2, MAPK8	23	241	16881	12.1819	0.454368	0.0371553	4.31639
GOTERM_MF_DIRECT	GO:0000978~RNA polymerase II core promoter proximal region sequence-specific DNA binding	4	17.3913	0.010557	FOS, JUN, ESR1, MYC	23	355	16881	8.26993	0.830075	0.0774037	12.1105
GOTERM_MF_DIRECT	GO:0004672~protein kinase activity	4	17.3913	0.0108823	AKT1, EGFR, CCND1, ERBB2	23	359	16881	8.17779	0.839153	0.0763739	12.4612
GOTERM_MF_DIRECT	GO:0001046~core promoter sequence-specific DNA binding	3	13.0435	0.00141744	PPARG, TP53, ESR1	23	43	16881	51.2063	0.210914	0.0195464	1.71047
GOTERM_MF_DIRECT	GO:0046934~phosphatidylinositol-4,5-bisphosphate 3-kinase activity	3	13.0435	0.00292418	EGFR, ERBB2, EGF	23	62	16881	35.514	0.386794	0.0343293	3.49925
GOTERM_MF_DIRECT	GO:0003690~double-stranded DNA binding	3	13.0435	0.00493585	EGFR, TP53, MYC	23	81	16881	27.1836	0.562347	0.0474451	5.84089
GOTERM_MF_DIRECT	GO:0042826~histone deacetylase binding	3	13.0435	0.00771857	CCND1, HSP90AA1, MAPK8	23	102	16881	21.587	0.725829	0.065838	8.99415
GOTERM_MF_DIRECT	GO:0005088~Ras guanyl-nucleotide exchange factor activity	3	13.0435	0.00972262	EGFR, ERBB2, EGF	23	115	16881	19.1467	0.804388	0.078342	11.2047
GOTERM_MF_DIRECT	GO:0008083~growth factor activity	3	13.0435	0.018643	IL6, VEGFA, EGF	23	162	16881	13.5918	0.956837	0.10988	20.459
GOTERM_MF_DIRECT	GO:0032403~protein complex binding	3	13.0435	0.0291643	CASP3, CCND1, MYC	23	206	16881	10.6887	0.992866	0.15671	30.2328
GOTERM_MF_DIRECT	GO:0004716~receptor signaling protein tyrosine kinase activity	2	8.69565	0.0129597	EGFR, ERBB2	23	10	16881	146.791	0.886779	0.0867697	14.6714
GOTERM_MF_DIRECT	GO:0004707~MAP kinase activity	2	8.69565	0.0180985	MAPK1, MAPK8	23	14	16881	104.851	0.952648	0.110693	19.9206
GOTERM_MF_DIRECT	GO:0070412~R-SMAD binding	2	8.69565	0.0270301	FOS, JUN	23	21	16881	69.9006	0.989706	0.150778	28.3442
GOTERM_MF_DIRECT	GO:0000982~transcription factor activity, RNA polymerase II core promoter proximal region sequence-specific binding	2	8.69565	0.0295677	FOS, JUN	23	23	16881	63.8223	0.993344	0.153865	30.5845
GOTERM_MF_DIRECT	GO:0051721~protein phosphatase 2A binding	2	8.69565	0.034624	AKT1, TP53	23	27	16881	54.3671	0.997218	0.172899	34.858
GOTERM_MF_DIRECT	GO:0004879~RNA polymerase II transcription factor activity, ligand-activated sequence-specific DNA binding	2	8.69565	0.0459088	PPARG, ESR1	23	36	16881	40.7754	0.99961	0.217499	43.539
GOTERM_MF_DIRECT	GO:0004714~transmembrane receptor protein tyrosine kinase activity	2	8.69565	0.0483994	EGFR, ERBB2	23	38	16881	38.6293	0.999748	0.222021	45.3058
