# Supplementary material for: Rapid Identification and Systematic Mechanism of Flavonoids from Potentilla freyniana Bornm. Based on UHPLC-Q-Exactive Orbitrap Mass Spectrometry and Network Pharmacology
Source: Int J Anal Chem. 2021 Jan 27;2021:6619959. doi: 10.1155/2021/6619959 (PMC7857931; doi:10.1155/2021/6619959)
Supplement: Supplementary Materials — Figure S1: compounds-target genes. Figure S2: PPI network. Table S1: compounds-target genes. Table S2: GO analysis. Table S3: KEGG pathway. [file 6619959.f1.zip › Table S3 KEGG pathway.xlsx]

## Sheet: Sheet1
Category	Term	Count	%	PValue	Genes	List Total	Pop Hits	Pop Total	Fold Enrichment	Bonferroni	Benjamini	FDR
KEGG_PATHWAY	hsa05200:Pathways in cancer	21	91.3043	1.78183e-23	EGFR, IL6, HSP90AA1, PTGS2, MMP9, ERBB2, PPARG, CYCS, TP53, CXCL8, AKT1, MAPK1, FOS, CASP3, CCND1, JUN, VEGFA, MAPK8, EGF, MYC, FN1	23	393	6879	15.9817	2.54802e-21	2.54802e-21	2.1102e-20
KEGG_PATHWAY	hsa05219:Bladder cancer	10	43.4783	1.73438e-15	EGFR, MAPK1, CCND1, MMP9, ERBB2, VEGFA, TP53, CXCL8, EGF, MYC	23	41	6879	72.948	2.54019e-13	1.2701e-13	2.09832e-12
KEGG_PATHWAY	hsa05161:Hepatitis B	13	56.5217	2.5872e-15	AKT1, FOS, MAPK1, CASP3, IL6, CCND1, JUN, MMP9, CYCS, TP53, CXCL8, MAPK8, MYC	23	145	6879	26.8147	3.65152e-13	1.2168e-13	3.01981e-12
KEGG_PATHWAY	hsa05210:Colorectal cancer	10	43.4783	9.74883e-14	AKT1, MAPK1, FOS, CASP3, CCND1, JUN, CYCS, TP53, MAPK8, MYC	23	62	6879	48.2398	1.39393e-11	3.48477e-12	1.15441e-10
KEGG_PATHWAY	hsa05205:Proteoglycans in cancer	12	52.1739	5.09185e-12	AKT1, EGFR, MAPK1, CASP3, CCND1, MMP9, ERBB2, VEGFA, TP53, ESR1, MYC, FN1	23	200	6879	17.9452	7.2813e-10	1.45626e-10	6.03018e-09
KEGG_PATHWAY	hsa05212:Pancreatic cancer	9	39.1304	1.17484e-11	AKT1, EGFR, MAPK1, CCND1, ERBB2, VEGFA, TP53, MAPK8, EGF	23	65	6879	41.412	1.68002e-09	2.80003e-10	1.39135e-08
KEGG_PATHWAY	hsa05215:Prostate cancer	9	39.1304	1.43458e-10	AKT1, EGFR, MAPK1, CCND1, HSP90AA1, INS, ERBB2, TP53, EGF	23	88	6879	30.5884	2.05145e-08	2.93065e-09	1.69896e-07
KEGG_PATHWAY	hsa05213:Endometrial cancer	8	34.7826	1.45171e-10	AKT1, EGFR, MAPK1, CCND1, ERBB2, TP53, EGF, MYC	23	52	6879	46.0134	2.07594e-08	2.59493e-09	1.71924e-07
KEGG_PATHWAY	hsa04668:TNF signaling pathway	9	39.1304	7.02616e-10	AKT1, MAPK1, FOS, CASP3, IL6, PTGS2, JUN, MMP9, MAPK8	23	107	6879	25.1568	1.00474e-07	1.11638e-08	8.32099e-07
KEGG_PATHWAY	hsa04151:PI3K-Akt signaling pathway	12	52.1739	1.85173e-09	AKT1, EGFR, MAPK1, IL6, CCND1, HSP90AA1, INS, VEGFA, TP53, EGF, MYC, FN1	23	345	6879	10.403	2.64798e-07	2.64798e-08	2.19298e-06
KEGG_PATHWAY	hsa04510:Focal adhesion	10	43.4783	5.77588e-09	AKT1, EGFR, MAPK1, CCND1, JUN, ERBB2, VEGFA, MAPK8, EGF, FN1	23	206	6879	14.5188	8.2595e-07	7.50864e-08	6.8403e-06
KEGG_PATHWAY	hsa04012:ErbB signaling pathway	8	34.7826	5.92785e-09	AKT1, EGFR, MAPK1, JUN, ERBB2, MAPK8, EGF, MYC	23	87	6879	27.5022	8.47682e-07	7.06402e-08	7.02028e-06
KEGG_PATHWAY	hsa04066:HIF-1 signaling pathway	8	34.7826	1.18836e-08	AKT1, EGFR, MAPK1, IL6, INS, ERBB2, VEGFA, EGF	23	96	6879	24.9239	1.69935e-06	1.30719e-07	1.40736e-05
KEGG_PATHWAY	hsa04915:Estrogen signaling pathway	8	34.7826	1.47569e-08	AKT1, EGFR, MAPK1, FOS, HSP90AA1, JUN, MMP9, ESR1	23	99	6879	24.1686	2.11024e-06	1.50731e-07	1.74764e-05
KEGG_PATHWAY	hsa05223:Non-small cell lung cancer	7	30.4348	1.49259e-08	AKT1, EGFR, MAPK1, CCND1, ERBB2, TP53, EGF	23	56	6879	37.3859	2.1344e-06	1.42294e-07	1.76765e-05
KEGG_PATHWAY	hsa04010:MAPK signaling pathway	10	43.4783	3.49679e-08	AKT1, EGFR, MAPK1, FOS, CASP3, JUN, TP53, MAPK8, EGF, MYC	23	253	6879	11.8216	5.0004e-06	3.12526e-07	4.14121e-05
KEGG_PATHWAY	hsa04917:Prolactin signaling pathway	7	30.4348	6.38858e-08	AKT1, MAPK1, FOS, CCND1, INS, ESR1, MAPK8	23	71	6879	29.4874	9.13563e-06	5.37392e-07	7.56591e-05
KEGG_PATHWAY	hsa05133:Pertussis	7	30.4348	8.91018e-08	MAPK1, FOS, CASP3, IL6, JUN, CXCL8, MAPK8	23	75	6879	27.9148	1.27415e-05	7.07864e-07	0.000105522
KEGG_PATHWAY	hsa04068:FoxO signaling pathway	8	34.7826	1.21599e-07	AKT1, EGFR, MAPK1, IL6, CCND1, INS, MAPK8, EGF	23	134	6879	17.8559	1.73884e-05	9.15188e-07	0.000144007
KEGG_PATHWAY	hsa05222:Small cell lung cancer	7	30.4348	1.89679e-07	AKT1, CCND1, PTGS2, CYCS, TP53, MYC, FN1	23	85	6879	24.6307	2.71237e-05	1.3562e-06	0.000224634
KEGG_PATHWAY	hsa04932:Non-alcoholic fatty liver disease (NAFLD)	8	34.7826	2.76461e-07	AKT1, CASP3, IL6, INS, JUN, CYCS, CXCL8, MAPK8	23	151	6879	15.8457	3.95332e-05	1.88257e-06	0.000327409
KEGG_PATHWAY	hsa05231:Choline metabolism in cancer	7	30.4348	5.32227e-07	AKT1, EGFR, MAPK1, FOS, JUN, MAPK8, EGF	23	101	6879	20.7288	7.61056e-05	3.45947e-06	0.000630308
KEGG_PATHWAY	hsa05142:Chagas disease (American trypanosomiasis)	7	30.4348	6.33396e-07	AKT1, MAPK1, FOS, IL6, JUN, CXCL8, MAPK8	23	104	6879	20.1309	9.05715e-05	3.93806e-06	0.00075012
KEGG_PATHWAY	hsa04620:Toll-like receptor signaling pathway	7	30.4348	7.09228e-07	AKT1, MAPK1, FOS, IL6, JUN, CXCL8, MAPK8	23	106	6879	19.751	0.000101414	4.22581e-06	0.000839926
KEGG_PATHWAY	hsa05230:Central carbon metabolism in cancer	6	26.087	1.38661e-06	AKT1, EGFR, MAPK1, ERBB2, TP53, MYC	23	64	6879	28.0394	0.000198265	7.93137e-06	0.00164213
KEGG_PATHWAY	hsa05214:Glioma	6	26.087	1.49905e-06	AKT1, EGFR, MAPK1, CCND1, TP53, EGF	23	65	6879	27.608	0.000214341	8.24475e-06	0.00177529
KEGG_PATHWAY	hsa05206:MicroRNAs in cancer	9	39.1304	1.55688e-06	EGFR, CASP3, CCND1, PTGS2, MMP9, ERBB2, VEGFA, TP53, MYC	23	286	6879	9.41183	0.000222609	8.24565e-06	0.00184377
KEGG_PATHWAY	hsa05216:Thyroid cancer	5	21.7391	1.76852e-06	MAPK1, CCND1, PPARG, TP53, MYC	23	29	6879	51.5667	0.000252867	9.03207e-06	0.00209442
KEGG_PATHWAY	hsa05218:Melanoma	6	26.087	2.33374e-06	AKT1, EGFR, MAPK1, CCND1, TP53, EGF	23	71	6879	25.275	0.000333669	1.15077e-05	0.00276378
KEGG_PATHWAY	hsa05160:Hepatitis C	7	30.4348	2.69955e-06	AKT1, EGFR, MAPK1, TP53, CXCL8, MAPK8, EGF	23	133	6879	15.7414	0.000385962	1.28678e-05	0.003197
KEGG_PATHWAY	hsa05132:Salmonella infection	6	26.087	5.0764e-06	MAPK1, FOS, IL6, JUN, CXCL8, MAPK8	23	83	6879	21.6207	0.000725664	2.34167e-05	0.00601175
KEGG_PATHWAY	hsa05164:Influenza A	7	30.4348	1.28026e-05	AKT1, MAPK1, IL6, JUN, CYCS, CXCL8, MAPK8	23	174	6879	12.0322	0.00182911	5.72104e-05	0.0151609
KEGG_PATHWAY	hsa05168:Herpes simplex infection	7	30.4348	1.70871e-05	FOS, CASP3, IL6, JUN, CYCS, TP53, MAPK8	23	183	6879	11.4405	0.0024405	7.40421e-05	0.0202342
KEGG_PATHWAY	hsa04919:Thyroid hormone signaling pathway	6	26.087	2.51097e-05	AKT1, MAPK1, CCND1, TP53, ESR1, MYC	23	115	6879	15.6045	0.00358429	0.000105604	0.029733
KEGG_PATHWAY	hsa04621:NOD-like receptor signaling pathway	5	21.7391	2.58417e-05	MAPK1, IL6, HSP90AA1, CXCL8, MAPK8	23	56	6879	26.7042	0.00368859	0.000105578	0.0305997
KEGG_PATHWAY	hsa04380:Osteoclast differentiation	6	26.087	4.70971e-05	AKT1, MAPK1, FOS, JUN, PPARG, MAPK8	23	131	6879	13.6986	0.00671242	0.000187067	0.0557623
KEGG_PATHWAY	hsa05120:Epithelial cell signaling in Helicobacter pylori infection	5	21.7391	5.26961e-05	EGFR, CASP3, JUN, CXCL8, MAPK8	23	67	6879	22.3199	0.00750742	0.000203648	0.0623895
KEGG_PATHWAY	hsa04014:Ras signaling pathway	7	30.4348	5.64401e-05	AKT1, EGFR, MAPK1, INS, VEGFA, MAPK8, EGF	23	226	6879	9.26376	0.00803868	0.000212376	0.0668208
KEGG_PATHWAY	hsa05220:Chronic myeloid leukemia	5	21.7391	6.99909e-05	AKT1, MAPK1, CCND1, TP53, MYC	23	72	6879	20.7699	0.00995913	0.00025661	0.0828579
KEGG_PATHWAY	hsa04921:Oxytocin signaling pathway	6	26.087	8.99946e-05	EGFR, MAPK1, FOS, CCND1, PTGS2, JUN	23	150	6879	11.9635	0.0127873	0.000321693	0.106527
KEGG_PATHWAY	hsa05166:HTLV-I infection	7	30.4348	0.000108243	AKT1, FOS, IL6, CCND1, JUN, TP53, MYC	23	254	6879	8.24255	0.0153604	0.00037748	0.128116
KEGG_PATHWAY	hsa04914:Progesterone-mediated oocyte maturation	5	21.7391	0.000146733	AKT1, MAPK1, HSP90AA1, INS, MAPK8	23	87	6879	17.1889	0.0207658	0.000499504	0.173636
KEGG_PATHWAY	hsa05202:Transcriptional misregulation in cancer	6	26.087	0.000149613	IL6, MMP9, PPARG, TP53, CXCL8, MYC	23	167	6879	10.7456	0.0211689	0.000497463	0.177041
KEGG_PATHWAY	hsa05323:Rheumatoid arthritis	5	21.7391	0.000153398	FOS, IL6, JUN, VEGFA, CXCL8	23	88	6879	16.9936	0.0216987	0.000498457	0.181516
KEGG_PATHWAY	hsa05152:Tuberculosis	6	26.087	0.00019665	AKT1, MAPK1, CASP3, IL6, CYCS, MAPK8	23	177	6879	10.1385	0.027732	0.000624777	0.232642
KEGG_PATHWAY	hsa05145:Toxoplasmosis	5	21.7391	0.000362606	AKT1, MAPK1, CASP3, CYCS, MAPK8	23	110	6879	13.5949	0.0505402	0.0011268	0.428587
KEGG_PATHWAY	hsa04015:Rap1 signaling pathway	6	26.087	0.000435439	AKT1, EGFR, MAPK1, INS, VEGFA, EGF	23	210	6879	8.54534	0.0603815	0.00132426	0.514469
KEGG_PATHWAY	hsa04722:Neurotrophin signaling pathway	5	21.7391	0.000505206	AKT1, MAPK1, JUN, TP53, MAPK8	23	120	6879	12.462	0.0697135	0.00150434	0.596673
KEGG_PATHWAY	hsa05169:Epstein-Barr virus infection	5	21.7391	0.00053792	AKT1, JUN, TP53, MAPK8, MYC	23	122	6879	12.2577	0.0740577	0.00156904	0.635198
KEGG_PATHWAY	hsa05134:Legionellosis	4	17.3913	0.000633702	CASP3, IL6, CYCS, CXCL8	23	54	6879	22.1546	0.0866609	0.00181132	0.747912
KEGG_PATHWAY	hsa05221:Acute myeloid leukemia	4	17.3913	0.000705272	AKT1, MAPK1, CCND1, MYC	23	56	6879	21.3634	0.0959671	0.00197627	0.832059
KEGG_PATHWAY	hsa04310:Wnt signaling pathway	5	21.7391	0.000856433	CCND1, JUN, TP53, MAPK8, MYC	23	138	6879	10.8365	0.115314	0.00235343	1.00957
KEGG_PATHWAY	hsa04370:VEGF signaling pathway	4	17.3913	0.000906248	AKT1, MAPK1, PTGS2, VEGFA	23	61	6879	19.6123	0.121599	0.00244328	1.068
KEGG_PATHWAY	hsa04210:Apoptosis	4	17.3913	0.000950357	AKT1, CASP3, CYCS, TP53	23	62	6879	19.2959	0.127127	0.00251472	1.11972
KEGG_PATHWAY	hsa05211:Renal cell carcinoma	4	17.3913	0.00114039	AKT1, MAPK1, JUN, VEGFA	23	66	6879	18.1265	0.150552	0.00296231	1.34223
KEGG_PATHWAY	hsa04115:p53 signaling pathway	4	17.3913	0.00119138	CASP3, CCND1, CYCS, TP53	23	67	6879	17.8559	0.15673	0.00303945	1.40185
KEGG_PATHWAY	hsa04662:B cell receptor signaling pathway	4	17.3913	0.00129763	AKT1, MAPK1, FOS, JUN	23	69	6879	17.3384	0.169462	0.00325227	1.526
KEGG_PATHWAY	hsa05140:Leishmaniasis	4	17.3913	0.00140969	MAPK1, FOS, PTGS2, JUN	23	71	6879	16.85	0.182683	0.00347203	1.65678
KEGG_PATHWAY	hsa04912:GnRH signaling pathway	4	17.3913	0.00287482	EGFR, MAPK1, JUN, MAPK8	23	91	6879	13.1467	0.337471	0.00695353	3.35204
KEGG_PATHWAY	hsa04024:cAMP signaling pathway	5	21.7391	0.00324157	AKT1, MAPK1, FOS, JUN, MAPK8	23	198	6879	7.5527	0.371423	0.00770843	3.7722
KEGG_PATHWAY	hsa05203:Viral carcinogenesis	5	21.7391	0.00367415	MAPK1, CASP3, CCND1, JUN, TP53	23	205	6879	7.2948	0.409255	0.0085919	4.26561
KEGG_PATHWAY	hsa04660:T cell receptor signaling pathway	4	17.3913	0.00375586	AKT1, MAPK1, FOS, JUN	23	100	6879	11.9635	0.416143	0.00864147	4.35855
KEGG_PATHWAY	hsa04810:Regulation of actin cytoskeleton	5	21.7391	0.00400633	EGFR, MAPK1, INS, EGF, FN1	23	210	6879	7.12112	0.436764	0.00907061	4.64293
KEGG_PATHWAY	hsa05146:Amoebiasis	4	17.3913	0.00442574	CASP3, IL6, CXCL8, FN1	23	106	6879	11.2863	0.469686	0.00986176	5.1174
KEGG_PATHWAY	hsa04931:Insulin resistance	4	17.3913	0.00466417	AKT1, IL6, INS, MAPK8	23	108	6879	11.0773	0.487542	0.0102325	5.38616
KEGG_PATHWAY	hsa04071:Sphingolipid signaling pathway	4	17.3913	0.00625884	AKT1, MAPK1, TP53, MAPK8	23	120	6879	9.96957	0.592546	0.0135113	7.16584
KEGG_PATHWAY	hsa04152:AMPK signaling pathway	4	17.3913	0.00670255	AKT1, CCND1, INS, PPARG	23	123	6879	9.72641	0.617754	0.0142511	7.65556
KEGG_PATHWAY	hsa05162:Measles	4	17.3913	0.00831592	AKT1, IL6, CCND1, TP53	23	133	6879	8.9951	0.697038	0.0174077	9.41632
KEGG_PATHWAY	hsa04910:Insulin signaling pathway	4	17.3913	0.00920163	AKT1, MAPK1, INS, MAPK8	23	138	6879	8.66919	0.733378	0.018976	10.3698
KEGG_PATHWAY	hsa04930:Type II diabetes mellitus	3	13.0435	0.0100766	MAPK1, INS, MAPK8	23	48	6879	18.6929	0.765021	0.0204768	11.3027
KEGG_PATHWAY	hsa04630:Jak-STAT signaling pathway	4	17.3913	0.010532	AKT1, IL6, CCND1, MYC	23	145	6879	8.25067	0.779987	0.0210992	11.7848
KEGG_PATHWAY	hsa05014:Amyotrophic lateral sclerosis (ALS)	3	13.0435	0.010901	CASP3, CYCS, TP53	23	50	6879	17.9452	0.791412	0.0215341	12.1735
KEGG_PATHWAY	hsa04923:Regulation of lipolysis in adipocytes	3	13.0435	0.0135465	AKT1, PTGS2, INS	23	56	6879	16.0225	0.857782	0.0263639	14.9156
KEGG_PATHWAY	hsa05416:Viral myocarditis	3	13.0435	0.0140121	CASP3, CCND1, CYCS	23	57	6879	15.7414	0.867066	0.0269005	15.3899
KEGG_PATHWAY	hsa04150:mTOR signaling pathway	3	13.0435	0.0144846	AKT1, MAPK1, INS	23	58	6879	15.47	0.875873	0.0274359	15.8689
KEGG_PATHWAY	hsa05131:Shigellosis	3	13.0435	0.0174626	MAPK1, CXCL8, MAPK8	23	64	6879	14.0197	0.919477	0.0326042	18.8308
KEGG_PATHWAY	hsa04664:Fc epsilon RI signaling pathway	3	13.0435	0.0195808	AKT1, MAPK1, MAPK8	23	68	6879	13.195	0.940859	0.0360589	20.8791
KEGG_PATHWAY	hsa04520:Adherens junction	3	13.0435	0.0212373	EGFR, MAPK1, ERBB2	23	71	6879	12.6375	0.953562	0.03859	22.4478
KEGG_PATHWAY	hsa05016:Huntington's disease	4	17.3913	0.0223056	CASP3, CYCS, PPARG, TP53	23	192	6879	6.23098	0.960276	0.0400106	23.4444
KEGG_PATHWAY	hsa04540:Gap junction	3	13.0435	0.0316644	EGFR, MAPK1, EGF	23	88	6879	10.1961	0.989961	0.0558929	31.6865
KEGG_PATHWAY	hsa04723:Retrograde endocannabinoid signaling	3	13.0435	0.0407454	MAPK1, PTGS2, MAPK8	23	101	6879	8.88377	0.997391	0.0708079	38.8994
KEGG_PATHWAY	hsa04725:Cholinergic synapse	3	13.0435	0.0483248	AKT1, MAPK1, FOS	23	111	6879	8.08343	0.999161	0.0827526	44.3782
KEGG_PATHWAY	hsa04726:Serotonergic synapse	3	13.0435	0.0483248	MAPK1, CASP3, PTGS2	23	111	6879	8.08343	0.999161	0.0827526	44.3782
